# Supplementary material for: Comparison of serum protein profiles between major depressive disorder and bipolar disorder
Source: BMC Psychiatry. 2020 Apr 3;20:145. doi: 10.1186/s12888-020-02540-0 (PMC7118970; doi:10.1186/s12888-020-02540-0)
Supplement: Supplementary file 1 — Additional file 1. List of 268 proteins subjected to statistical analysis. (Protein IDs and majority protein IDs). [file 12888_2020_2540_MOESM1_ESM.xlsx]

## Sheet: qq
Additional file 1. List of 268 proteins subjected to statistical analysis
T: Protein IDs	T: Majority protein IDs
A00001	A00001
A0A075B6H9	A0A075B6H9
A0A075B6I0	A0A075B6I0
A0A075B6I2;P06318;P06319	A0A075B6I2;P06318;P06319
A0A075B6I5;P01702;P06316	A0A075B6I5;P01702;P06316
A0A075B6I8	A0A075B6I8
A0A075B6J0	A0A075B6J0
A0A075B6J4	A0A075B6J4
A0A075B6J9	A0A075B6J9
A0A075B6K3	A0A075B6K3
A0A075B6K4	A0A075B6K4
A0A075B6K5	A0A075B6K5
A0A075B6Q5	A0A075B6Q5
A0A075B6R2;A0A087WW49	A0A075B6R2;A0A087WW49
A0A075B6R9	A0A075B6R9
A0A075B6S3;P06310	A0A075B6S3;P06310
A0A075B6S8	A0A075B6S8
A0A075B7B8	A0A075B7B8
A0A075B7D8	A0A075B7D8
A0A075B7E8	A0A075B7E8
P01764;A0A087WSX3	P01764;A0A087WSX3
A0A087WSY6	A0A087WSY6
A0A087WSY8	A0A087WSY8
A0A087WTK4;P80362;P01600;P01593	A0A087WTK4;P80362;P01600
A0A087WTM7;A8MUN2;G3V186;E9PEW5	A0A087WTM7
A0A087WTX5;P01834;A0A075B6H6;A0A075B7D4;A0A075B6S9;P01606;P04432	A0A087WTX5;P01834;A0A075B6H6
A0A087WU91	A0A087WU91
A0A087WV47;P01857	A0A087WV47;P01857
A0A087WVW2;A0A075B6N8;P01860	A0A087WVW2;A0A075B6N8;P01860
A0A087WW89;P01771	A0A087WW89
A0A087WWC9;A0A087WXC3;A0A087WWU7;A0A087WYN7;A0A087WWT5;A0A087WX49;A0A087WU42;A0A087X2A1;B9A064;A0A075B6K8;P0CG04;A0A075B6K7;P01715	A0A087WWC9;A0A087WXC3;A0A087WWU7;A0A087WYN7;A0A087WWT5;A0A087WX49;A0A087WU42;A0A087X2A1;B9A064;A0A075B6K8;P0CG04
A0A087WXB8;Q9Y274;C9J480;C9J0E2;C9JXM2;C9JWJ3;C9IZL6;Q9Y274-2;C9JMW7;C9J9Y4;C9JWI9	A0A087WXB8;Q9Y274;C9J480;C9J0E2;C9JXM2;C9JWJ3;C9IZL6
A0A087WXL8	A0A087WXL8
A0A087WYC5;A0A087WSX2	A0A087WYC5
A0A087WYE1	A0A087WYE1
A0A087WYJ9	A0A087WYJ9
A0A087WYL9;A0A087WWV8	A0A087WYL9;A0A087WWV8
A0A087WZH9	A0A087WZH9
A0A087WZW8;P04433;A0A087WUS2	A0A087WZW8
A0A087X010	A0A087X010
A0A087X0N5	A0A087X0N5
A0A087X0P6;A0A075B6S2	A0A087X0P6;A0A075B6S2
A0A087X0Q4;A0A087WW87;A0A075B6R1;P01614;P06309	A0A087X0Q4;A0A087WW87;A0A075B6R1;P01614
A0A087X130	A0A087X130
A0A087X1J7;P22352;H0YBE4;E5RG32;Q6NXQ3;H0YC19	A0A087X1J7;P22352;H0YBE4
A0A087X1V9;A0A075B6P5;P01617	A0A087X1V9;A0A075B6P5;P01617
A0A087X2C0;A0A075B6N9;P01871;P01871-2	A0A087X2C0;A0A075B6N9;P01871;P01871-2
A0A096LPE2;P35542;A0A087X0E2;E9PR14;G3V1D9;P0DJI9-2;P0DJI9	A0A096LPE2;P35542;A0A087X0E2
A6XND1;A6XND0;P17936;P17936-2;B3KWK7;H0Y5K2;H0Y485;C9JMX4	A6XND1;A6XND0;P17936;P17936-2;B3KWK7;H0Y5K2;H0Y485
B0YIW2;P02656	B0YIW2;P02656
B4DPQ0;P00736;F5H2D0;F5H3N3;F5H1V0;F5H6Y3;F5GWL0;F5H1N6	B4DPQ0;P00736;F5H2D0
B4E1Z4;P00751;H7C5H1;P00751-2;C9JRT3;H7C526;F2Z3N2;F8WCJ9	B4E1Z4;P00751
B5MC79;B5MC16;Q7Z624-2;Q7Z624	B5MC79;B5MC16;Q7Z624-2;Q7Z624
B7ZKJ8	B7ZKJ8
C9JF17;P05090;C9JX71;F8WBT9;REV__Q8N1C3	C9JF17;P05090
D3DQH8;P09486;F5GY03;E5RK62;F5H4E2	D3DQH8;P09486;F5GY03
D6R934;P02746;D6RGJ1	D6R934;P02746
D6RAR4;CON__ENSEMBL:ENSBTAP00000023055	D6RAR4
D6REX5;P49908;D6RIS9;R4GMT5	D6REX5;P49908;D6RIS9
D6RF35;D6RBJ7;CON__Q3MHN5;CON__ENSEMBL:ENSBTAP00000018229	D6RF35;D6RBJ7
E7END6;P04070;P04070-2;H7BYX9;E7ENR9	E7END6;P04070;P04070-2;H7BYX9
E7ESC6;Q9UIA9;E5RIW1	E7ESC6;Q9UIA9
E7ETH0;G3XAM2;P05156;A0A087X0I2;D6R9Z8;CON__Q32PI4	E7ETH0;G3XAM2;P05156;A0A087X0I2
E9PF63;O75116;C9JFJ0;D6REE7;Q14DU5	E9PF63;O75116
E9PHK0;P05452;CON__Q2KIS7	E9PHK0;P05452
E9PLK3;P55786;P55786-2;A6NEC2;H0YCQ5;H0YDG0;A6NEC2-2;E9PP11;E9PJY4;E9PJ74;E9PPD4;E9PRQ5;A6NEC2-3	E9PLK3;P55786;P55786-2
G3V2W1;Q9UK55	G3V2W1;Q9UK55
G3XAK1;P26927;Q2TV78;Q2TV78-2;H7C0F8	G3XAK1;P26927
G3XAP6;P49747;P49747-2	G3XAP6;P49747;P49747-2
H0YD13;H0YDW7;H0YCV9;H0Y5E4;P16070-15;P16070-18;P16070-12;P16070-14;P16070-13;P16070-11;P16070-10;P16070-16;P16070-8;P16070-9;P16070-17;P16070-6;P16070-4;P16070-3;P16070-7;P16070-5;P16070;E9PKC6;H0YDX6;H0Y2P0;Q86UZ1;H0YD17;P16070-19	H0YD13;H0YDW7;H0YCV9;H0Y5E4;P16070-15;P16070-18;P16070-12;P16070-14;P16070-13;P16070-11;P16070-10;P16070-16;P16070-8;P16070-9;P16070-17;P16070-6;P16070-4;P16070-3;P16070-7;P16070-5;P16070;E9PKC6;H0YDX6;H0Y2P0;Q86UZ1;H0YD17;P16070-19
H0Y755;M9MML0;P08637;C9JC71	H0Y755;M9MML0;P08637
H0YAC1;P03952;E9PBC5;C9J075;P20718	H0YAC1;P03952;E9PBC5
H0YAW0;O75762	H0YAW0;O75762
H0YL18;P61769;H0YLF3;F5H6I0	H0YL18;P61769;H0YLF3;F5H6I0
I3L145;P04278;B4DYU0;P04278-2;P04278-3;I3L1J1;P04278-4;P04278-5;I3L2X4;I3L2F1;B0FWH5;I3L4B9;B0FWH6;I3L1C1;I3L1G4;B0FWH7;I3L0M1	I3L145;P04278;B4DYU0;P04278-2;P04278-3;I3L1J1;P04278-4;P04278-5;I3L2X4
K7ER74;P02655;Q6P163;V9GYJ8;K7EMC3	K7ER74;P02655;Q6P163
K7ERG9;P00746	K7ERG9;P00746
K7ERI9;P02654	K7ERI9;P02654
O00391;O00391-2;A8MXT8;H0Y5Z8	O00391;O00391-2
O14791;O14791-2;O14791-3;B1AH96;B1AH94;B1AH95;F8WCH3	O14791;O14791-2;O14791-3
O43866	O43866
O75636;O75636-2	O75636;O75636-2
O75882-3;O75882-2;O75882	O75882-3;O75882-2;O75882
O95445	O95445
P00450;E9PFZ2	P00450;E9PFZ2
P00734;E9PIT3;C9JV37	P00734;E9PIT3
P00738;J3QLC9;P00738-2;H3BS21;J3KRH2;J3KSV1;J3QQI8;H3BMJ7	P00738;J3QLC9;P00738-2
P00739;P00739-2;J3KTC3	P00739;P00739-2
P00740;P00740-2	P00740;P00740-2
P00742;Q5JVE8;B7ZBK1;F8WBM7	P00742
P00747;Q5TEH5;CON__P06868;Q02325;Q15195	P00747
P00748	P00748
P00915;E5RHP7;E5RH81;E5RFE7;E5RIF9;E5RG43;E5RFL2;H0YBE2;E5RGU8;E5RG81;E5RII2;E5RJI8;E5RJF6;E5RHS7	P00915;E5RHP7;E5RH81;E5RFE7;E5RIF9;E5RG43
P01008;Q8TCE1	P01008
P01009;P01009-2;P01009-3;G3V2B9;G3V544;G3V5R8;G3V387	P01009;P01009-2;P01009-3
P01011;G3V595;P01011-2;A0A087WY93;P01011-3	P01011;G3V595
P01019	P01019
P01023;H0YFH1;F8W7L3;F5H1E8	P01023
P01024;M0QYC8;CON__Q2UVX4;M0QXZ3;M0R0Q9;M0R1Q1;O95568	P01024
P01031	P01031
P01034	P01034
P01042;CON__P01045-1;CON__Q2KJ62;CON__P01044-1	P01042
P01042-2;P01042-3	P01042-2;P01042-3
P01344;P01344-2;P01344-3	P01344;P01344-2;P01344-3
P01591;D6RD17;D6RHJ6;C9JA05	P01591;D6RD17;D6RHJ6
P01597	P01597
P01598	P01598
P01608	P01608
P01609	P01609
P01611	P01611
P01613	P01613
P01616	P01616
P01619	P01619
P01620	P01620
P01621	P01621
P01622	P01622
P01624	P01624
P01625;P06314	P01625;P06314
P01699	P01699
P01701	P01701
P01708	P01708
P01714;A0A075B6J8	P01714;A0A075B6J8
P01717	P01717
P01762	P01762
P01763	P01763
P01765;P01774	P01765
P01767	P01767
P01770	P01770
P01772	P01772
P01775	P01775
P01776	P01776
P01778	P01778
P01780	P01780
P01781;P01782	P01781
P01824	P01824
P01859	P01859
P01861	P01861
P01876	P01876
P01877	P01877
P01880;P01880-2;A0A087WUS7	P01880;P01880-2;A0A087WUS7
P02042;E9PFT6;E9PEW8;C9JRG0;CON__Q3SX09;A8MUF7;CON__P02070;P02100	P02042;E9PFT6;E9PEW8
P02647;F8W696;CON__P15497	P02647;F8W696
P02649;H0Y7L5;E9PEV4;E7ERP7;CON__Q03247	P02649;H0Y7L5;E9PEV4;E7ERP7
V9GYM3;P02652;V9GYG9;V9GYE3;V9GYC1;V9GYS1	V9GYM3;P02652;V9GYG9;V9GYE3
P02671;P02671-2;A0A087WUA0;CON__P02672	P02671;P02671-2
P02675;D6REL8;CON__P02676	P02675;D6REL8
P02679-2;P02679;C9JEU5;C9JC84;C9JPQ9;C9JU00	P02679-2;P02679;C9JEU5;C9JC84
P02743	P02743
P02745;X6RLJ0	P02745;X6RLJ0
P02747	P02747
P02748;CON__Q3MHN2;REV__Q4AC99;Q96BY6-2;Q96BY6-3;Q96BY6	P02748
P02749;J3QLI0;J3QRN2;J3KS17;CON__P17690	P02749
P02750;CON__Q2KIF2	P02750
P02751;P02751-8;P02751-3;P02751-15;P02751-14;P02751-17;P02751-7;P02751-9;P02751-11;P02751-6;P02751-4;P02751-12;H0Y7Z1;P02751-16;P02751-2;H0Y4K8	P02751;P02751-8;P02751-3;P02751-15;P02751-14;P02751-17;P02751-7;P02751-9;P02751-11;P02751-6;P02751-4;P02751-12
Q5VY30;P02753	Q5VY30;P02753
P02760;S4R3Y4;CON__P00978	P02760
P02763	P02763
P02765;C9JV77;CON__P12763	P02765;C9JV77
P02766;A0A087WT59;A0A087WV45	P02766;A0A087WT59;A0A087WV45
P02774;P02774-3;P02774-2	P02774;P02774-3;P02774-2
P02775	P02775
P02776	P02776
P02787;H7C5E8;C9JVG0;F8WCI6;F8WEK9;F8WC57;CON__Q2HJF0	P02787
P02790;Q9BS19	P02790;Q9BS19
P03950	P03950
P03951;P03951-2;X6R3B1;D6RB32;H0Y596	P03951;P03951-2
P04003;A6PVY5;F2Z2V7;CON__Q28065	P04003
P04004;CON__Q3ZBS7	P04004
P04114	P04114
P04180;J3QSE5;J3QKT0;I3L1Q6	P04180;J3QSE5
P04196	P04196
P04206	P04206
P04207	P04207
P04217;REV__E9PJW4;REV__E9PM62;CON__Q2KJF1	P04217
P04275;P04275-2	P04275
P04430	P04430
P04431	P04431
P05154;G3V5Q9;G3V2M1;G3V264;G3V482;G3V265;G3V4B4;G3V3F5;G3V5I3	P05154;G3V5Q9;G3V2M1
P05155;P05155-3;P05155-2;H9KV48;E9PGN7;H0YCA1;CON__P50448;C9JZJ9;A0A087WUD9;B5MCB9	P05155;P05155-3;P05155-2;H9KV48;E9PGN7
P05160;CON__Q2TBQ1	P05160
P05543;CON__Q9TT36	P05543
P05546;CON__ENSEMBL:ENSBTAP00000018574	P05546
P06276;F8WF14;F8WEX7;H0Y885;H7C4Y0	P06276;F8WF14;F8WEX7
P06331	P06331
P06396;P06396-4;P06396-3;Q5T0H8;Q5T0H7;Q5T0I1;REV__H0YJM7;REV__Q6TDU7-4;REV__Q6TDU7-2;REV__Q6TDU7-3;REV__Q6TDU7;REV__F8W8F9	P06396;P06396-4;P06396-3
P06681;P06681-3;B4DQI1;H0Y3H6;P06681-2;E9PDZ0;Q8N6L6;H0Y868;C9JYQ5;A2ABG0	P06681;P06681-3;B4DQI1;H0Y3H6;P06681-2;E9PDZ0
P06727;CON__Q32PJ2	P06727
P06889	P06889
P07225;G5E9F8;H7BXT0;C9K0R0;CON__P07224	P07225;G5E9F8
P07357	P07357
P07358;F5GY80;F5H7G1	P07358;F5GY80;F5H7G1
P07359	P07359
P07360;Q5SQ08	P07360;Q5SQ08
P08185;G3V350;G3V4V7	P08185
P08519;A0A087WWY0;Q16609	P08519
P08571;D6RFL4	P08571;D6RFL4
P08603;P08603-2	P08603
P08697;P08697-2;C9JMH6;CON__P28800	P08697;P08697-2;C9JMH6
P09871;F8WCZ6;H0Y5D1;F5H7T4	P09871;F8WCZ6
P0C0L4;P0C0L4-2	P0C0L4;P0C0L4-2
P0C0L5;F5GXS0	P0C0L5;F5GXS0
P0CG05;A0A075B6K9	P0CG05;A0A075B6K9
P0DJI8;E9PQD6	P0DJI8;E9PQD6
P10643;CON__Q29RQ1	P10643
P10909-4;P10909;P10909-5;P10909-2;H0YC35;H0YLK8;P10909-3;E7ERK6;E7ETB4;H0YAS8;E5RJZ5;E5RGB0;E5RH61;E5RG36	P10909-4;P10909;P10909-5;P10909-2;H0YC35;H0YLK8;P10909-3
P11597;P11597-2;H3BRJ9	P11597;P11597-2;H3BRJ9
P12259	P12259
P13671;C9JC72	P13671
P15169;B1AP58;CON__Q2KJ83	P15169
P15814	P15814
P18135;P18136	P18135;P18136
P18428	P18428
P19652	P19652
P19823;A0A087WTE1;Q5T987	P19823;A0A087WTE1
P19827;P19827-3;H7C0N0;F8WAS2;B5MCP1;H7C5I0	P19827;P19827-3
P20742;P20742-2;F5GXY0	P20742;P20742-2
P20851-2;P20851;Q5VVQ7	P20851-2;P20851;Q5VVQ7
P22792	P22792
P22891;P22891-2	P22891;P22891-2
P23083	P23083
P23142;CON__ENSEMBL:ENSBTAP00000016046	P23142
P23142-4;P23142-2;P23142-3;B1AHM7;B1AHM9;B1AHN3;B1AHM8;B1AHM6	P23142-4;P23142-2;P23142-3
P25311;C9JEV0;H7BZJ8	P25311;C9JEV0
P27169;F8WF42;REV__U3KQV1;REV__A4PB68	P27169
P27918;E9PAQ1;C9J7V5	P27918;E9PAQ1
P29622	P29622
P31944	P31944
P32119;A6NIW5;P32119-2	P32119;A6NIW5
P33151;I3L1J2;P33151-2;H3BPG1;H3BR64;H3BR11	P33151;I3L1J2;P33151-2
P35858;P35858-2	P35858;P35858-2
P36955;I3L4Z0;I3L4N7;I3L107;I3L4F9;I3L2R7;CON__Q95121;I3L3Z3;I3L425;I3L1U4	P36955
P36980-2;P36980	P36980-2;P36980
P43251-4;P43251;P43251-3;P43251-2;C9JSN9	P43251-4;P43251;P43251-3;P43251-2;C9JSN9
P43652	P43652
P48740;C9JMA2	P48740
P48740-2;P48740-4	P48740-2;P48740-4
P51149;C9J592;C9J8S3;C9J4S4;C9IZZ0;C9J4V0;C9J7D1	P51149;C9J592;C9J8S3
P51884	P51884
P55056	P55056
P55058;P55058-4;P55058-3;P55058-2	P55058;P55058-4;P55058-3;P55058-2
P60709;G5E9R0;E7EVS6;C9JZR7;C9JTX5;C9JUM1;Q6S8J3;A5A3E0;P0CG38;F8WCH0;Q9BYX7;P0CG39	P60709
P62328;Q5T4B6	P62328;Q5T4B6
P68871;F8W6P5	P68871
P69905;G3V1N2	P69905;G3V1N2
P80108;P80108-2	P80108
P80419	P80419
P80748	P80748
P83593	P83593
Q03591;B1AKG0	Q03591;B1AKG0
Q06033-2;Q06033;A0A087WW43;E7ET33	Q06033-2;Q06033;A0A087WW43;E7ET33
Q06141	Q06141
Q08380;K7EP36;K7ESM3;K7EKQ5;K7ERZ6;K7EJD3;K7ES75;K7EN99;K7EJY8;K7EQT9	Q08380
Q12805-2;Q12805-4;Q12805-3;Q12805;Q12805-5;Q580Q6;C9JQX7;C9J4J8;C9JPZ9;C9JUM4	Q12805-2;Q12805-4;Q12805-3;Q12805;Q12805-5
Q13790	Q13790
Q14520-2;Q14520	Q14520-2;Q14520
Q15582;H0Y8L3;S4R3C6;H0Y9D7;H0Y8M8;H0YAB8;H0YAH8;D6RBX4	Q15582;H0Y8L3
Q15848	Q15848
Q16610;Q16610-4;Q16610-2;Q16610-3	Q16610;Q16610-4;Q16610-2
Q6UXB8;Q6UXB8-2	Q6UXB8;Q6UXB8-2
Q92954-3;Q92954;Q92954-4;Q92954-5;Q92954-2;J3KP74;E9PLR3	Q92954-3;Q92954;Q92954-4;Q92954-5;Q92954-2
Q96IY4;A0A087WSY5;Q96IY4-2;CON__Q2KIG3	Q96IY4;A0A087WSY5;Q96IY4-2
Q96KN2	Q96KN2
Q96PD5;Q96PD5-2;M0QYW3	Q96PD5;Q96PD5-2
Q96Q89-4;Q96Q89-3;Q96Q89;Q96Q89-2	Q96Q89-4;Q96Q89-3;Q96Q89;Q96Q89-2
Q9GZZ0	Q9GZZ0
Q9NZP8;F5H6S5;H0YFL7;F5GWF3;F5H7C8;H0YGP8;F5H2Z5	Q9NZP8
Q9UGM5;Q9UGM5-2;E9PG08;F8WEP7;F8WAW1	Q9UGM5;Q9UGM5-2;E9PG08
Q9Y6R7;A0A087WXI2;A0A087WUZ2	Q9Y6R7;A0A087WXI2
