# Supplementary material for: Comparison of serum protein profiles between major depressive disorder and bipolar disorder
Source: BMC Psychiatry. 2020 Apr 3;20:145. doi: 10.1186/s12888-020-02540-0 (PMC7118970; doi:10.1186/s12888-020-02540-0)
Supplement: Supplementary file 2 — Additional file 2. Major protein IDs and full protein IDs of the differentially-expressed proteins. (Protein IDs and majority protein IDs). [file 12888_2020_2540_MOESM2_ESM.xlsx]

## Sheet: Sheet1
Additional file 2. Major protein IDs and full protein IDs of the differentially expressed proteins
Majority protein IDs	T: Protein IDs
P51149;C9J592;C9J8S3	P51149;C9J592;C9J8S3;C9J4S4;C9IZZ0;C9J4V0;C9J7D1
E9PF63;O75116	E9PF63;O75116;C9JFJ0;D6REE7;Q14DU5
E7ESC6;Q9UIA9	E7ESC6;Q9UIA9;E5RIW1
P01763	P01763
P03950	P03950
A0A075B6J4	A0A075B6J4
P08571;D6RFL4	P08571;D6RFL4
P23083	P23083
Q96Q89-4;Q96Q89-3;Q96Q89;Q96Q89-2	Q96Q89-4;Q96Q89-3;Q96Q89;Q96Q89-2
A0A075B6Q5	A0A075B6Q5
A0A096LPE2;P35542;A0A087X0E2	A0A096LPE2;P35542;A0A087X0E2;E9PR14;G3V1D9;P0DJI9-2;P0DJI9
P01780	P01780
P05160	P05160;CON__Q2TBQ1
D6REX5;P49908;D6RIS9	D6REX5;P49908;D6RIS9;R4GMT5
