# Supplementary material for: Comparison of serum protein profiles between major depressive disorder and bipolar disorder
Source: BMC Psychiatry. 2020 Apr 3;20:145. doi: 10.1186/s12888-020-02540-0 (PMC7118970; doi:10.1186/s12888-020-02540-0)
Supplement: Supplementary file 3 — Additional file 3. IPA Canonical Pathway and IPA Diseases & Functions. [file 12888_2020_2540_MOESM3_ESM.xls]

## Sheet: Sheet0
IPA Canonical pathway					IPA Diseases & Functions
Ingenuity Canonical Pathways	-log(p-value)	Ratio	Molecules		Categories	Diseases or Functions Annotation	p-value	Molecules	# Molecules
LXR/RXR Activation	2.57	0.0165	CD14,SAA4		Humoral Immune Response,Inflammatory Response	Classical complement pathway	7.06e-08	IGHV1OR15-1,IGHV3-48,IGHV3-7,IGLV3-25	4
IL-12 Signaling and Production in Macrophages	2.41	0.0137	RAB7A,SAA4		Cellular Function and Maintenance	Endocytosis	7.2e-08	CD14,IGHV1OR15-1,IGHV3-48,IGHV3-7,IGLV3-25,RAB7A	6
Clathrin-mediated Endocytosis Signaling	2.11	0.00962	RAB7A,SAA4		Cellular Function and Maintenance	Receptor-mediated endocytosis	7.22e-06	IGHV1OR15-1,IGHV3-48,IGHV3-7,IGLV3-25	4
Actin Cytoskeleton Signaling	2.04	0.00889	ROCK2,CD14		Cellular Movement,Immune Cell Trafficking	Leukocyte migration	1.81e-05	IGHV1OR15-1,IGHV3-48,IGHV3-7,IGLV3-25,ROCK2	5
Extrinsic Prothrombin Activation Pathway	1.99	0.0625	F13B		Cellular Assembly and Organization,Cellular Function and Maintenance	Formation of membrane blebs	0.000649	ROCK2	1
MIF-mediated Glucocorticoid Regulation	1.66	0.0294	CD14		Hereditary Disorder,Neurological Disease,Organismal Injury and Abnormalities,Skeletal and Muscular Disorders	Autosomal dominant Charcot-Marie-Tooth disease axonal, type 2B	0.000649	RAB7A	1
Coagulation System	1.65	0.0286	F13B		Carbohydrate Metabolism,Free Radical Scavenging,Lipid Metabolism,Small Molecule Biochemistry	Reduction of 1-palmitoyl-2-linoleoyl phosphatidylcholine hydroperoxide	0.000649	SELENOP	1
Intrinsic Prothrombin Activation Pathway	1.58	0.0244	F13B		Hereditary Disorder,Neurological Disease,Organismal Injury and Abnormalities,Psychological Disorders	Amyotrophic lateral sclerosis 9	0.000649	ANG	1
MIF Regulation of Innate Immunity	1.57	0.0238	CD14		Developmental Disorder,Hematological Disease,Hereditary Disorder,Organismal Injury and Abnormalities	Deficiency of factor XIII subunit B	0.000649	F13B	1
iNOS Signaling	1.55	0.0227	CD14		Cell-To-Cell Signaling and Interaction,Cellular Function and Maintenance,Inflammatory Response	Phagocytosis of Borrelia burgdorferi strain 297	0.000649	CD14	1
Semaphorin Signaling in Neurons	1.48	0.0192	ROCK2		Cellular Assembly and Organization	Development of cytoplasm	0.000689	ANG,RAB7A,ROCK2	3
PCP pathway	1.42	0.0167	ROCK2		Cancer,Organismal Injury and Abnormalities,Renal and Urological Disease	Early stage bladder carcinoma	0.0013	KIF20B	1
Actin Nucleation by ARP-WASP Complex	1.4	0.0161	ROCK2		Organismal Injury and Abnormalities	Chills	0.0013	CD14	1
Ephrin A Signaling	1.4	0.0161	ROCK2		Cell Death and Survival,Neurological Disease,Organismal Injury and Abnormalities	Apoptosis of neural precursor cells	0.0013	ROCK2	1
Remodeling of Epithelial Adherens Junctions	1.38	0.0152	RAB7A		Cell Signaling	Activation of Phospholipase A2	0.0013	ANG	1
IL-10 Signaling	1.36	0.0145	CD14		Cardiovascular Disease,Hematological Disease,Organismal Injury and Abnormalities	Susceptibility to venous thrombosis	0.0013	F13B	1
Ephrin B Signaling	1.34	0.0139	ROCK2		Cellular Assembly and Organization	Attachment of uropod	0.0013	ROCK2	1
Chemokine Signaling	1.33	0.0135	ROCK2		Hereditary Disorder,Neurological Disease,Organismal Injury and Abnormalities	Autosomal dominant neuropathy	0.00135	ANG,RAB7A	2
Toll-like Receptor Signaling	1.32	0.0133	CD14		Metabolic Disease,Neurological Disease,Organismal Injury and Abnormalities,Psychological Disorders	Alzheimer disease	0.00149	CD14,ROCK2,SELENOP,XPO7	4
VDR/RXR Activation	1.31	0.013	CD14		Cancer,Hematological Disease,Immunological Disease,Organismal Injury and Abnormalities	Mixed phenotype acute myeloid leukemia	0.00259	CD14	1
Macropinocytosis Signaling	1.25	0.0112	CD14		Cell-To-Cell Signaling and Interaction	Aggregation of skin cell lines	0.00259	ROCK2	1
LPS-stimulated MAPK Signaling	1.22	0.0105	CD14		Cell-To-Cell Signaling and Interaction,Hematological System Development and Function	Interaction of monocytes	0.00259	CD14	1
PEDF Signaling	1.22	0.0105	ROCK2		Carbohydrate Metabolism,Lipid Metabolism,Molecular Transport,Small Molecule Biochemistry	Efflux of phosphatidylcholine	0.00259	CD14	1
Cholecystokinin/Gastrin-mediated Signaling	1.17	0.00935	ROCK2		Cell-To-Cell Signaling and Interaction	Signaling of macrophages	0.00259	CD14	1
VEGF Signaling	1.17	0.00926	ROCK2		Cell-To-Cell Signaling and Interaction,Cellular Growth and Proliferation,Hematological System Development and Function	Induction of follicular T helper cells	0.00259	ROCK2	1
RhoA Signaling	1.12	0.00826	ROCK2		Cell Signaling	I-kappaB kinase/NF-kappaB cascade	0.00293	CD14,ROCK2	2
NGF Signaling	1.11	0.00806	ROCK2		RNA Post-Transcriptional Modification	Cleavage of RNA fragment	0.00324	ANG	1
FXR/RXR Activation	1.11	0.008	SAA4		Lipid Metabolism,Small Molecule Biochemistry	Synthesis of diacylglycerol	0.00324	ANG	1
Atherosclerosis Signaling	1.11	0.008	SAA4		Cell-To-Cell Signaling and Interaction,Hair and Skin Development and Function	Aggregation of epithelial cell lines	0.00324	ROCK2	1
CCR3 Signaling in Eosinophils	1.08	0.00752	ROCK2		Cell-To-Cell Signaling and Interaction	Aggregation of squamous cell carcinoma cell lines	0.00389	ROCK2	1
IL-6 Signaling	1.07	0.00735	CD14		Cell-To-Cell Signaling and Interaction,Hematological System Development and Function,Immune Cell Trafficking,Inflammatory Response	Activation of peripheral blood monocytes	0.00389	CD14	1
Phagosome Maturation	1.07	0.00725	RAB7A		Cell-To-Cell Signaling and Interaction,Cellular Growth and Proliferation,Hematological System Development and Function	Induction of CD4+ T-lymphocytes	0.00453	ROCK2	1
Gα12/13 Signaling	1.05	0.00699	ROCK2		Tissue Morphology	Quantity of bladder cancer cell lines	0.00453	KIF20B	1
Endocannabinoid Cancer Inhibition Pathway	1.01	0.00637	ROCK2		Cellular Assembly and Organization,Cellular Function and Maintenance	Bundling of microtubules	0.00453	KIF20B	1
Hepatic Cholestasis	1.01	0.00633	CD14		Protein Trafficking	Targeting of protein	0.00484	RAB7A,XPO7	2
Gαq Signaling	1	0.00625	ROCK2		Carbohydrate Metabolism,Lipid Metabolism,Small Molecule Biochemistry	Binding of lipopolysaccharide	0.00518	CD14	1
CXCR4 Signaling	0.979	0.00585	ROCK2		Cancer,Organismal Injury and Abnormalities,Renal and Urological Disease	Invasive bladder carcinoma	0.00518	KIF20B	1
RhoGDI Signaling	0.971	0.00575	ROCK2		Cell-To-Cell Signaling and Interaction	Activation of epithelial cells	0.00583	CD14	1
Acute Phase Response Signaling	0.967	0.00571	SAA4		Molecular Transport,Protein Trafficking	Transport of protein	0.00606	RAB7A,XPO7	2
Ephrin Receptor Signaling	0.967	0.00571	ROCK2		Gene Expression	Transcription of rRNA	0.00647	ANG	1
Hepatic Fibrosis / Hepatic Stellate Cell Activation	0.951	0.00549	CD14		Developmental Disorder,Hereditary Disorder,Metabolic Disease,Organismal Injury and Abnormalities	Niemann-Pick disease type C	0.00647	CD14	1
Production of Nitric Oxide and Reactive Oxygen Species in Macrophages	0.924	0.00513	SAA4		Inflammatory Response	Acute phase reaction	0.00647	CD14	1
IL-8 Signaling	0.907	0.00493	ROCK2		Cellular Compromise,Inflammatory Response	Degranulation of cells	0.00709	CD14,RAB7A,SELENOP	3
Leukocyte Extravasation Signaling	0.896	0.00481	ROCK2		Cellular Assembly and Organization,Cellular Function and Maintenance	Formation of ribosome	0.00712	ANG	1
Thrombin Signaling	0.896	0.00481	ROCK2		Cellular Assembly and Organization,Cellular Compromise,Nervous System Development and Function	Retraction of neurites	0.00712	ROCK2	1
LPS/IL-1 Mediated Inhibition of RXR Function	0.893	0.00476	CD14		Molecular Transport	Transport of molecule	0.0073	ANG,CD14,RAB7A,XPO7	4
Breast Cancer Regulation by Stathmin1	0.889	0.00474	ROCK2		Infectious Diseases	Melioidosis	0.00776	CD14	1
AMPK Signaling	0.876	0.00459	RAB7A		Molecular Transport	Export of molecule	0.00791	CD14,XPO7	2
Cardiac Hypertrophy Signaling	0.839	0.00418	ROCK2		Cell-To-Cell Signaling and Interaction,Hematological System Development and Function,Immune Cell Trafficking,Inflammatory Response	Binding of macrophages	0.00905	CD14	1
Signaling by Rho Family GTPases	0.821	0.00398	ROCK2		Cancer,Cell-To-Cell Signaling and Interaction,Organismal Injury and Abnormalities	Binding of tumor cells	0.0103	CD14	1
Role of Macrophages, Fibroblasts and Endothelial Cells in Rheumatoid Arthritis	0.735	0.00322	ROCK2		Cell-To-Cell Signaling and Interaction,Inflammatory Response	Response of monocytes	0.0103	CD14	1
Protein Kinase A Signaling	0.654	0.00261	ROCK2		Neurological Disease,Organismal Injury and Abnormalities,Psychological Disorders	Sporadic amyotrophic lateral sclerosis	0.011	ANG	1
Axonal Guidance Signaling	0.569	0.00209	ROCK2		Molecular Transport,Protein Trafficking	Nuclear export of protein	0.0116	XPO7	1
					Cardiovascular System Development and Function,Cell-To-Cell Signaling and Interaction	Activation of vascular endothelial cells	0.0116	CD14	1
					Skeletal and Muscular System Development and Function	Contraction of smooth muscle	0.0116	ROCK2	1
					Cell Morphology	Cell rounding	0.0123	ROCK2	1
					Cell Death and Survival	Necroptosis	0.0129	CD14	1
					Cardiovascular System Development and Function,Embryonic Development,Organismal Development,Tissue Development	Angiogenesis of chorioallantoic membrane	0.0129	ANG	1
					Infectious Diseases,Inflammatory Disease	Systemic inflammatory response syndrome	0.0129	CD14	1
					Hereditary Disorder,Neurological Disease,Organismal Injury and Abnormalities,Psychological Disorders	Autosomal dominant amyotrophic lateral sclerosis	0.0129	ANG	1
					Cell Signaling,DNA Replication, Recombination, and Repair,Nucleic Acid Metabolism,Small Molecule Biochemistry	Hydrolysis of GTP	0.0142	RAB7A	1
					Cellular Assembly and Organization	Formation of autophagic vacuoles	0.0148	RAB7A	1
					Cellular Movement,Embryonic Development	Migration of embryonic cell lines	0.0167	ROCK2	1
					Inflammatory Response	Fever	0.0174	CD14	1
					Infectious Diseases	Production of HIV-1	0.0174	CD14	1
					Cell-To-Cell Signaling and Interaction,Cellular Compromise	Respiratory burst of cells	0.018	CD14	1
					Cell-To-Cell Signaling and Interaction,Hematological System Development and Function,Immune Cell Trafficking,Inflammatory Response	Activation of neutrophils	0.018	CD14	1
					Cell Cycle,Cellular Assembly and Organization,Cellular Function and Maintenance,DNA Replication, Recombination, and Repair	Duplication of centrosome	0.0199	ROCK2	1
					Cell-To-Cell Signaling and Interaction,Cellular Assembly and Organization,Cellular Function and Maintenance	Organization of adherens junctions	0.0199	ANG	1
					Cardiovascular System Development and Function,Cell Morphology,Cellular Development,Organismal Development,Tissue Development	Sprouting of vascular endothelial cells	0.0212	ANG	1
					Amino Acid Metabolism,Post-Translational Modification,Small Molecule Biochemistry	Phosphorylation of L-threonine	0.0244	ROCK2	1
					Cell Signaling	Activation of Phospholipase C	0.0244	ANG	1
					DNA Replication, Recombination, and Repair,Nucleic Acid Metabolism,Small Molecule Biochemistry	Incorporation of thymidine	0.025	ANG	1
					Nutritional Disease	Obesity	0.0252	ANG,CD14	2
					Cellular Development,Cellular Growth and Proliferation,Embryonic Development,Hematological System Development and Function,Hematopoiesis,Humoral Immune Response,Lymphoid Tissue Structure and Development,Organ Development,Organismal Development,Tissue Development	Differentiation of B lymphocytes	0.0257	CD14	1
					Connective Tissue Disorders,Developmental Disorder,Organismal Injury and Abnormalities,Skeletal and Muscular Disorders	Idiopathic scoliosis	0.0276	CD14	1
					Cell Death and Survival	Initiation of apoptosis	0.0288	CD14	1
					Hematological Disease,Immunological Disease	Primary antiphospholipid antibody syndrome	0.0295	CD14	1
					Dermatological Diseases and Conditions,Infectious Diseases,Organismal Injury and Abnormalities	Lepromatous leprosy	0.0307	CD14	1
					Cancer,Cellular Movement,Organismal Injury and Abnormalities,Tumor Morphology	Invasion of tumor cells	0.0339	CD14	1
					Cellular Compromise,Inflammatory Response	Degranulation of neutrophils	0.0375	CD14,RAB7A	2
					Neurological Disease	Mild cognitive impairment	0.0401	ROCK2	1
					Drug Metabolism,Lipid Metabolism,Small Molecule Biochemistry	Synthesis of prostaglandin E2	0.0414	CD14	1
					Cellular Movement,Hematological System Development and Function,Immune Cell Trafficking	Migration of granulocytes	0.0426	ROCK2	1
					Cardiovascular Disease,Hematological Disease,Metabolic Disease	Hypercholesterolemia	0.0445	CD14	1
					Infectious Diseases	Severe sepsis	0.0457	CD14	1
					Cellular Development,Cellular Growth and Proliferation,Hematological System Development and Function,Humoral Immune Response,Lymphoid Tissue Structure and Development	Proliferation of B lymphocytes	0.0464	CD14	1
					Organismal Injury and Abnormalities,Skeletal and Muscular Disorders	Pain of muscle	0.0464	CD14	1
					Post-Translational Modification	Phosphorylation of protein	0.0466	ANG,ROCK2	2
					Cell Signaling,Post-Translational Modification,Protein Synthesis	Serine phosphorylation of peptide	0.0482	ROCK2	1
